# Supplementary material for: Inhibition of Polyamine Catabolism Reduces Cellular Senescence
Source: MDPI journal article supplement (doi:10.3390/ijms241713397), 2023-08-29
Supplement: s1 [file s1]

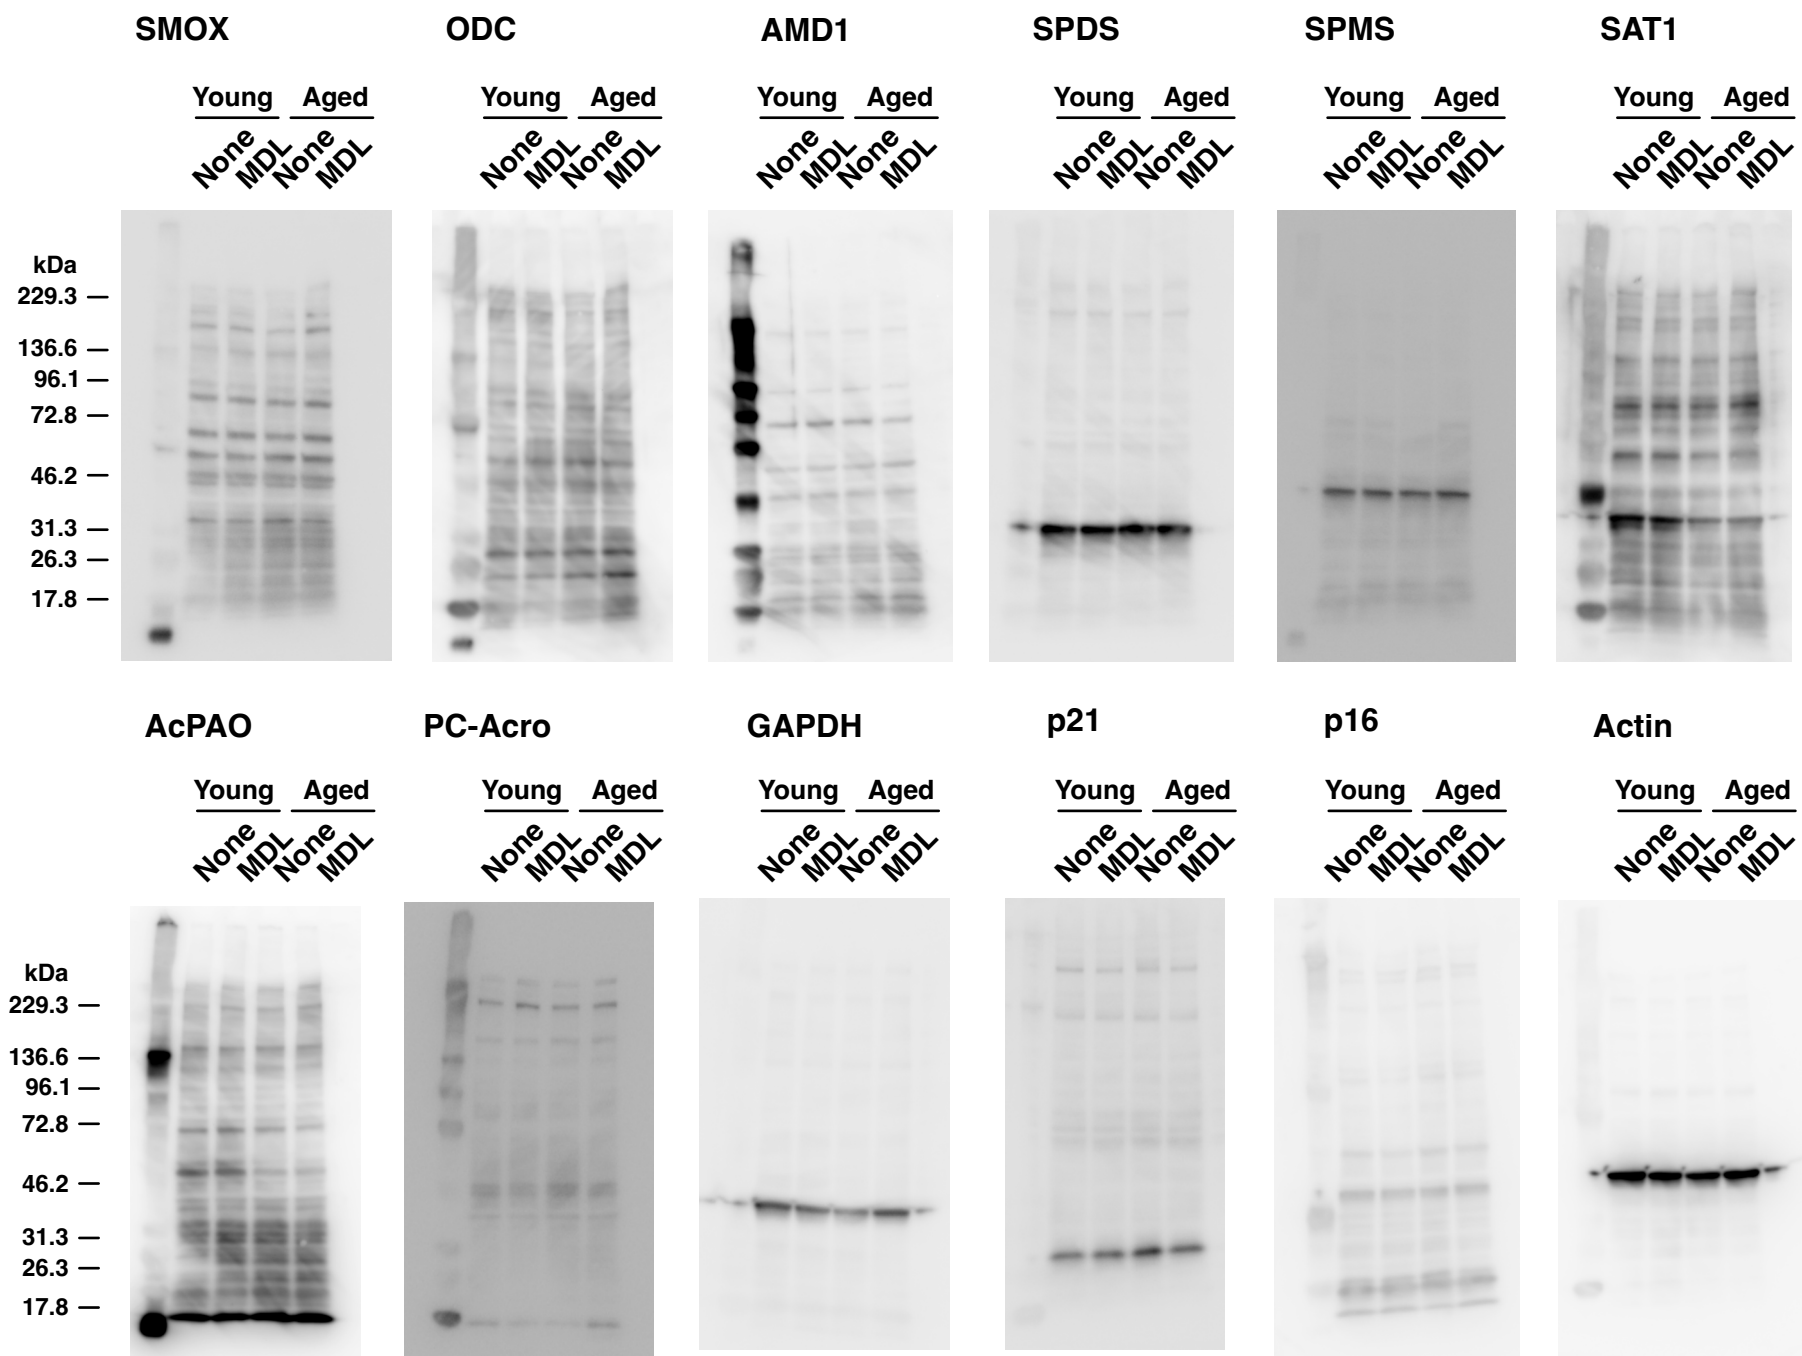

**Supplemental Figure S1.** The full length, non-adjusted images for SMOX, ODC, AMD1, SPDS, SPMS, SAT1, AcPAO, PC-Acro, GAPDH, p21, p16 and actin were shown.
